# Supplementary material for: A Deletion in GDF7 is Associated with a Heritable Forebrain Commissural Malformation Concurrent with Ventriculomegaly and Interhemispheric Cysts in Cats
Source: MDPI journal article supplement (doi:10.3390/genes11060672), 2020-06-19
Supplement: s1 [file s1]

**Table S1. Regions of homozygosity that was unique to 18 cats with the inherited forebrain commissural malformation, and were absent in all the unaffected cats.**

| SNP*            | Chr. A3 Position <sup>†</sup> |
|-----------------|-------------------------------|
| chrA3.160566453 | 125601560                     |
| chrA3.160530122 | 125625991                     |
| chrUn.24474142  | 125637518                     |
| chrUn.47705095  | 125688296                     |
| chrA3.160408014 | 125732886                     |
| chrA3.160379824 | 125762335                     |
| chrA3.160343100 | 125791293                     |
| chrA3.160337238 | 125795275                     |
| chrA3.160313108 | 125815756                     |
| chrA3.160271820 | 125839780                     |
| chrA3.160202681 | 125898946                     |
| chrA3.160122222 | 125972504                     |
| chrA3.160090785 | 125992080                     |
| chrA3.160044067 | 126031109                     |
| chrA3.160043010 | 126032117                     |
| chrA3.160002944 | 126063095                     |
| chrA3.159964768 | 126096458                     |
| chrA3.159917387 | 126130456                     |
| chrA3.159873847 | 126155695                     |
| chrA3.159846599 | 126189378                     |
| chrA3.159815186 | 126219694                     |
| chrA3.159670655 | 126341357                     |
| chrA3.159646777 | 126359090                     |
| chrA3.159621145 | 126377299                     |
| chrA3.159565119 | 126419390                     |
| chrA3.159538209 | 126438891                     |
| chrA3.159462631 | 126500287                     |
| chrA3.159427910 | 126532359                     |
| chrA3.159396654 | 126546963                     |
| chrA3.159339796 | 126592318                     |
| chrA3.159285393 | 126633822                     |
| chrA3.159248736 | 126665749                     |
| chrA3.159136100 | 126756640                     |
| chrA3.159105911 | 126769774                     |
| chrA3.159072838 | 126802789                     |
| chrA3.158996855 | 126872329                     |
| chrA3.158967674 | 126896343                     |

---

|                 |           |
|-----------------|-----------|
| chrA3.158926828 | 126925447 |
| chrA3.158896738 | 126953595 |
| chrA3.158828000 | 127003756 |
| chrA3.158754772 | 127069181 |
| chrA3.158724720 | 127099328 |
| chrA3.158673277 | 127142715 |
| chrA3.158624618 | 127189752 |
| chrA3.158518903 | 127274926 |
| chrA3.158488087 | 127298681 |
| chrA3.158461077 | 127325195 |
| chrA3.158433403 | 127348216 |
| chrA3.158389360 | 127386120 |
| chrA3.158358606 | 127398951 |
| chrA3.158279342 | 127468992 |
| chrA3.158214221 | 127531499 |
| chrA3.158123659 | 127601646 |
| chrA3.158064272 | 127654673 |
| chrA3.158029141 | 127684693 |

---

\*SNP IDs are based on an early cat genome assembly [26] †Positions based on current cat genome assembly [27].
