# Supplementary material for: A Deletion in GDF7 is Associated with a Heritable Forebrain Commissural Malformation Concurrent with Ventriculomegaly and Interhemispheric Cysts in Cats
Source: MDPI journal article supplement (doi:10.3390/genes11060672), 2020-06-19
Supplement: s1 [file s1]

|                               |             |             |            |            |            |             |     |
|-------------------------------|-------------|-------------|------------|------------|------------|-------------|-----|
| <i>Felis catus</i> (wildtype) | MDLSAAAALC  | LWLLSACRPR  | DGLEAAAVLR | AAGAGPVGSP | GGDGGSGSGG | RTLAPAAGVS  | 60  |
| <i>Felis catus</i> (mutant)   | .....       | .....       | .....      | .....      | .....      | .....       |     |
| <i>Homo sapiens</i>           | .....       | .....       | .....      | .....R..   | ..G..G.G.. | ....Q...AA  |     |
| <i>Equus caballus</i>         | .....       | .....       | .....      | .....A..   | ..--G.G..  | ....A...A.  |     |
| <i>Bos Taurus</i>             | .....       | .....       | .....      | .....AE..  | ..--G.GS.  | T...A.E.T.  |     |
| <i>Rattus norvegicus</i>      | .....       | .....       | .....      | .....AW..  | ..----G..  | ....R.P.P.  |     |
| <i>Mus musculus</i>           | .....       | .....       | .....      | .....AW..  | ..----G..  | ....P.P.    |     |
| Consensus                     | MDLSAAAALC  | LWLLSACRPR  | DGLEAAAVLR | AAGAGPAGSP | GG--GGGGG  | RTLAPAAGXS  |     |
|                               |             |             |            |            |            |             |     |
| <i>Felis catus</i> (wildtype) | AAPAAAAPGV  | RAARRAAGSG  | FRNGSVVPHQ | FMMSLYRNLA | GRAPAGAAAA | STSGSGRHRG  | 120 |
| <i>Felis catus</i> (mutant)   | .....       | ...PP.PA..  | TARWCRTSS- | -----      | -----      | -----       |     |
| <i>Homo sapiens</i>           | .V....V.RA  | .....       | .....H     | .....S..   | .....V     | .A.---...   |     |
| <i>Equus caballus</i>         | TG.....A    | .....S..    | .....      | .....S..   | .....      | .....       |     |
| <i>Bos Taurus</i>             | .L...S..P   | .G...T..    | .....      | .....S.T   | .T...PV.V  | .....       |     |
| <i>Rattus norvegicus</i>      | .LQ...V..P  | .V.....     | .....H     | .....S..   | ....V..... | AA.---...   |     |
| <i>Mus musculus</i>           | .LQ...V..P  | .V.....     | .....H     | .....S..   | .....      | A.---...    |     |
| Consensus                     | AAPAAAXPGP  | RAARRAAGSG  | FRNGSVVPHX | FMMSLYRSLA | GRAPAGAAAA | STSG--HGR   |     |
|                               |             |             |            |            |            |             |     |
| <i>Felis catus</i> (wildtype) | ADTITGFADQ  | ANQDESAA-E  | TGQSFLFDVS | SLPDADEVVG | AELRVLRRES | PELGPGSATP  | 179 |
| <i>Felis catus</i> (mutant)   | -----       | -----       | -----      | -----      | -----      | -----       |     |
| <i>Homo sapiens</i>           | .....T..    | .T.....-    | .....      | ..N.....   | .....G.    | ..S...W.S   |     |
| <i>Equus caballus</i>         | .....       | .T.....-    | .....      | ..S.....   | .....F     | ..PSS...I.  |     |
| <i>Bos Taurus</i>             | ..V.....    | .IP.....-Q  | ..LN.....  | .....L.    | .....      | GAR.....S.  |     |
| <i>Rattus norvegicus</i>      | V.....T..   | .T...T..A   | P.....     | ..SE.....N | .....R.    | ..PDRD...L  |     |
| <i>Mus musculus</i>           | V.....T..   | .T.E.....-  | P.....     | ..S.S...N  | .....R.    | ..PDRD...L  |     |
| Consensus                     | ADTITGFXDQ  | ATQDESAA-E  | TGQSFLFDVS | SLSDADEVVG | AELRVLRRES | PEPGPGSATP  |     |
|                               |             |             |            |            |            |             |     |
| <i>Felis catus</i> (wildtype) | LPLLLL-STC  | PGAARAPRL   | HSRAAEPLAG | ARWEVFDVAD | AVRRHRQEPH | ATRAFCLLLR  | 238 |
| <i>Felis catus</i> (mutant)   | -----       | -----       | -----      | -----      | -----      | -----       |     |
| <i>Homo sapiens</i>           | P.....-     | .....       | Y.....V.   | Q...A..... | .M...R..R  | PP.....     |     |
| <i>Equus caballus</i>         | Q.....L..   | .....S..L.  | .....D.    | .....      | .....R..R  | ..V.....    |     |
| <i>Bos Taurus</i>             | -.....-     | .S..S.....  | .....F.DA  | .....      | .L...R..R  | TS.....S.S  |     |
| <i>Rattus norvegicus</i>      | ..R...-..   | .DE.GTAH..  | .....G.    | ...A...T.  | ..QS..RW.R | .S.K...V..  |     |
| <i>Mus musculus</i>           | P.....-     | .DE.GTAH..  | .....DS    | ...A...T.  | ..QS..RW.R | TS.K...V..  |     |
| Consensus                     | XPLLLL-STC  | PGAAXAPRL   | HSRAAEPLDG | ARWEXFDVAD | AVRRHRREPR | ASRAFCLLLR  |     |
|                               |             |             |            |            |            |             |     |
| <i>Felis catus</i> (wildtype) | SVAGPSQGPL  | ALRLLGFGSR  | GRD---GAAA | EERALLVVSS | RTQRKGSLFR | EIRAQARALG  | 295 |
| <i>Felis catus</i> (mutant)   | -----       | -----       | -----      | -----      | -----      | -----       |     |
| <i>Homo sapiens</i>           | A....VPS..  | ...R...WP   | .GG---S..  | ...V.....  | .....E...  | .....       |     |
| <i>Equus caballus</i>         | AA...AR...  | ..Q.....    | .GG---...  | .....      | .....E...  | .....       |     |
| <i>Bos Taurus</i>             | G.V.SARV..  | ...P...L.   | .GG---...  | .....      | .....E...  | ...S.....   |     |
| <i>Rattus norvegicus</i>      | A.TASESS..  | ...R...WP   | .GGDGG.T.  | .....I..   | .....E...  | .....R      |     |
| <i>Mus musculus</i>           | A.T.AESS..  | ...R...WP   | .GGDGG.T.  | .....I..   | ..H..E...  | .....R      |     |
| Consensus                     | AVAGPXXSPL  | ALRRLLGFGWX | GGG---GAAA | EERALLVVSS | RTQRKESLFR | EIRAQARALG  |     |
|                               |             |             |            |            |            |             |     |
| <i>Felis catus</i> (wildtype) | AALAAEPPRD  | PGPGTGSPTA  | VISGRRRRRT | ALTGARATQG | SGGGGG---- | -----       | 360 |
| <i>Felis catus</i> (mutant)   | -----       | -----       | -----      | -----      | -----      | -----       |     |
| <i>Homo sapiens</i>           | ....S..LP.  | ..T..A..R.  | ..G.....   | ..A.T.TA.. | ....-----  | -----       |     |
| <i>Equus caballus</i>         | .P.....P.   | .....       | ..G.....   | ..A.T..A.  | ....-----  | -----       |     |
| <i>Bos Taurus</i>             | ...V.SRP.   | SR..V.....  | ..G.....   | ..A...A.   | ....-----  | -----       |     |
| <i>Rattus norvegicus</i>      | ..-.....P.  | ...A..RK.   | NLG.....   | ..A.T.GA.. | .....GGGG  | GGGGGGGGGG  |     |
| <i>Mus musculus</i>           | ..-....L.P. | ..L.A..RK.  | TPG.....   | ..A.T.GA.. | .....GGGG  | GGGGGGGG--- |     |
| Consensus                     | AALAAEPPPD  | PGPGTGSPTA  | VIGGRRRRRT | ALAGTRAAQG | SGGG-----  | -----       |     |
|                               |             |             |            |            |            |             |     |
| <i>Felis catus</i> (wildtype) | -AGRGHGRRG  | RTRCSRRLPH  | VDFKELGWDD | WIIAPLDYEA | YHCEGVCDFF | LRSHLEPTNH  | 400 |
| <i>Felis catus</i> (mutant)   | -----       | -----       | -----      | -----      | -----      | -----       |     |
| <i>Homo sapiens</i>           | -.....      | .S...K...   | .....      | .....      | ....L....  | .....       |     |
| <i>Equus caballus</i>         | -.....      | .S...K...   | .....      | .....      | .....      | .....       |     |
| <i>Bos Taurus</i>             | -.....      | .S...K...   | .....      | .....      | .....      | .....       |     |
| <i>Rattus norvegicus</i>      | G.....      | .S...KS..   | .....      | .....      | .....      | .....       |     |
| <i>Mus musculus</i>           | -.....      | .S...K...   | .....      | .....      | .....      | .....       |     |
| Consensus                     | -AGRGHGRRG  | RSRCSRKPLH  | VDFKELGWDD | WIIAPLDYEA | YHCEGVCDFF | LRSHLEPTNH  |     |

|                               |       |       |        |       |          |       |          |       |          |       |          |       |       |     |
|-------------------------------|-------|-------|--------|-------|----------|-------|----------|-------|----------|-------|----------|-------|-------|-----|
| <i>Felis catus</i> (wildtype) | AI    | IQ    | TLLNSM | AP    | DAAPASCC | VP    | ARLSPISI | LY    | IDAANNVV | YK    | QYEDMVVE | AC    | GCR   | 455 |
| <i>Felis catus</i> (mutant)   | ----- | ----- | -----  | ----- | -----    | ----- | -----    | ----- | -----    | ----- | -----    | ----- | ----- |     |
| <i>Homo sapiens</i>           | ..... | ..... | .....  | ..... | .....    | ..... | .....    | ..... | .....    | ..... | .....    | ..... | ..... |     |
| <i>Equus caballus</i>         | ..... | ..... | .....  | ..... | .....    | ..... | .....    | ..... | .....    | ..... | .....    | ..... | ..... |     |
| <i>Bos Taurus</i>             | ..... | ..... | .....  | ..... | .....    | ..... | .....    | ..... | .....    | ..... | .....    | ..... | ..... |     |
| <i>Rattus norvegicus</i>      | ..... | ..... | .....  | ..... | .....    | ..... | .....    | ..... | .....    | ..... | .....    | ..... | ..... |     |
| <i>Mus musculus</i>           | ..... | ..... | .....  | ..... | .....    | ..... | .....    | ..... | .....    | ..... | .....    | ..... | ..... |     |
| Consensus                     | AI    | IQ    | TLLNSM | AP    | DAAPASCC | VP    | ARLSPISI | LY    | IDAANNVV | YK    | QYEDMVVE | AC    | GCR   |     |
